# Supplementary material
Source: publisher figshare collection journal article supplement (https://acs.figshare.com/ndownloader/files/14990507)
Supplement: Supplementary file 1 [file 14990507]

## Supporting Information

# Decoration of Pd nanoparticles with N and S doped carbon quantum dots as the robust catalyst for the chemoselective hydrogenation reaction

Chunshan Lu\*, Qianwen Zhu, Xuejie Zhang, Haoke Ji, Yebin Zhou, Hao Wang, Qiangqiang Liu, Juanjuan Nie, Wenfeng Han\* and Xiaonian Li\*

Industrial Catalysis Institute of Zhejiang University of Technology, State Key Laboratory Breeding Base of Green Chemistry Synthesis Technology, Hangzhou, 310032, People's Republic of China.

E-mail: lcszjcn@zjut.edu.cn; jackhanwf@hotmail.com; xnli@zjut.edu.cn

**Keywords:** N,S-CQDs, selective hydrogenation, noble metal catalyst, nonmetallic promoter

**Table S1.** The actual N,S-CQDs loadings of different catalysts.

| Catalyst      | Pd@N,S-CQD-25 | Pd@N,S-CQD-31.25 | Pd@N,S-CQD-62.5 | Pd@N,S-CQD-125 |
|---------------|---------------|------------------|-----------------|----------------|
| Loading (wt%) | 0.43          | 0.54             | 1.07            | 2.15           |

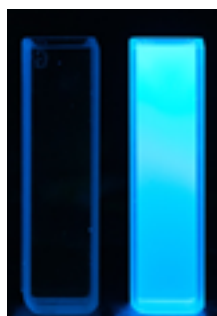

**Figure S1.** The photoluminescent photographs of the N,S-CQDs solution before (right) and after (left) impregnation under 365 nm UV light.

**Table S2. Reusability test of Pd@N,S-CQDs-62.5 for the hydrogenation of p-CNB.**

| Runs            | Reaction time(min) | Conversion (%) | Selectivity of production (%) |         |       |
|-----------------|--------------------|----------------|-------------------------------|---------|-------|
|                 |                    |                | p-CAN                         | Aniline | other |
| 1               | 240                | 100            | 100                           | 0       | 0     |
| 2               | 240                | 100            | 100                           | 0       | 0     |
| 3               | 240                | 100            | 100                           | 0       | 0     |
| 4               | 240                | 100            | 100                           | 0       | 0     |
| 5               | 240                | 100            | 100                           | 0       | 0     |
| 6 <sup>a</sup>  | 235                | 100            | 100                           | 0       | 0     |
| 7               | 240                | 100            | 99.9                          | 0.01    | 0     |
| 8               | 242                | 100            | 100                           | 0       | 0     |
| 9               | 238                | 100            | 100                           | 0       | 0     |
| 10              | 236                | 100            | 100                           | 0       | 0     |
| 11 <sup>a</sup> | 238                | 100            | 99.98                         | 0.02    | 0     |
| 12              | 240                | 100            | 99.99                         | 0.01    | 0     |
| 13              | 242                | 100            | 100                           | 0       | 0     |
| 14              | 245                | 100            | 100                           | 0       | 0     |
| 15              | 243                | 100            | 100                           | 0       | 0     |
| 16 <sup>a</sup> | 230                | 100            | 99.9                          | 0.01    | 0     |
| 17              | 232                | 100            | 100                           | 0       | 0     |
| 18              | 235                | 100            | 100                           | 0       | 0     |
| 19              | 234                | 100            | 100                           | 0       | 0     |
| 20              | 236                | 100            | 100                           | 0       | 0     |
| 21 <sup>a</sup> | 238                | 100            | 100                           | 0       | 0     |
| 22              | 239                | 100            | 100                           | 0       | 0     |
| 23              | 237                | 100            | 99.99                         | 0.01    | 0     |
| 24              | 235                | 100            | 100                           | 0       | 0     |
| 25              | 238                | 100            | 100                           | 0       | 0     |

Reaction conditions: 0.02 g catalyst, 1 g p-CNB, 25 ml methanol, P = 1 MPa, T = 323 K. The used Pd/AC was washed with deionized water and methanol until pH 7.0.

<sup>a</sup>: About five percent of the initial fresh catalyst was added every five times because of loss during the catalyst filtration.

**Table S3. The actual Pd content in the used Pd@N,S-CQDs-62.5 and reaction liquid of the hydrogenation of p-CNB over Pd@N,S-CQDs-62.5.**

| Element | Standard solution ( $\mu\text{g ml}^{-1}$ ) | Linear regression equation | Correlation coefficient | Pd loading amount (wt %) | Pd concentration in the reaction liquid ( $\mu\text{g.ml}^{-1}$ ) |
|---------|---------------------------------------------|----------------------------|-------------------------|--------------------------|-------------------------------------------------------------------|
| Pd      | 0.5, 1.0, 1.5, 2.0, 3.0                     | $[C]=28.8629[A]+0.1050$    | 0.999                   | 0.490                    | /                                                                 |

Note: The actual Pd content in the sample or reaction liquid was analyzed using the air-acetylene flame atomic absorption spectrophotometer on a Beijing Purkinje TAS-990 atomic absorption spectrophotometer. The wavelength, acetylene flow rate, burner height and lamp current were 244.79 nm, 1300 ml min<sup>-1</sup>, 6 mm and 6.0 mA, respectively.

**Table S4. The S content in the reaction liquid of the hydrogenation of p-CNB over Pd@N,S-CQDs-62.5.**

| Element | Standard solution ( $\mu\text{g ml}^{-1}$ ) | Oven temperature (°C) | S concentration in the reaction liquid ( $\mu\text{g ml}^{-1}$ ) |
|---------|---------------------------------------------|-----------------------|------------------------------------------------------------------|
| S       | 10                                          | 900                   | /                                                                |

Note: The S content in the reaction liquid was measured on a JF-WK-2000 Microcoulomb comprehensive analyzer.

**Table S5. Pilot experiment for the hydrogenation of 2-chloro-4-nitrotoluene into 3-chloro-4-methylaniline.**

| Runs            | Raw material<br>Kg | Catalyst<br>Kg | Conversion<br>% | Selectivity<br>% |         |       |
|-----------------|--------------------|----------------|-----------------|------------------|---------|-------|
|                 |                    |                |                 | $\rho$ -CAN      | Aniline | other |
| 1               | 1000               | 10             | 100             | 99.9             | 0.01    | 0     |
| 2               | 1000               | 10             | 100             | 100              | 0       | 0     |
| 3               | 1000               | 10             | 100             | 99.8             | 0.02    | 0     |
| 4               | 1000               | 10             | 100             | 100              | 0       | 0     |
| 5               | 1000               | 10             | 100             | 99.9             | 0.01    | 0     |
| 6               | 1000               | 10             | 100             | 100              | 0       | 0     |
| 7               | 1000               | 10             | 100             | 99.9             | 0.01    | 0     |
| 8               | 1000               | 10             | 100             | 100              | 0       | 0     |
| 9               | 1000               | 10             | 100             | 100              | 0       | 0     |
| 10              | 1000               | 10             | 100             | 100              | 0       | 0     |
| 11 <sup>a</sup> | 1000               | 10+0.5         | 100             | 99.98            | 0.02    | 0     |
| 12              | 1000               | 10             | 100             | 99.99            | 0.01    | 0     |
| 13              | 1000               | 10             | 100             | 100              | 0       | 0     |
| 14              | 1000               | 10             | 100             | 100              | 0       | 0     |
| 15              | 1000               | 10             | 100             | 100              | 0       | 0     |
| 16              | 1000               | 10             | 100             | 99.9             | 0.01    | 0     |
| 17              | 1000               | 10             | 100             | 100              | 0       | 0     |
| 18 <sup>a</sup> | 1000               | 10+0.2         | 100             | 99.9             | 0.01    | 0     |
| 19              | 1000               | 10             | 100             | 100              | 0       | 0     |
| 20              | 1000               | 10             | 100             | 100              | 0       | 0     |
| 21              | 1000               | 10             | 100             | 99.9             | 0.01    | 0     |
| 22              | 1000               | 10             | 100             | 100              | 0       | 0     |
| 23              | 1000               | 10             | 100             | 99.99            | 0.01    | 0     |
| 24              | 1000               | 10             | 100             | 100              | 0       | 0     |
| 25              | 1000               | 10             | 100             | 100              | 0       | 0     |

Reaction conditions: the mass ratio of raw material-methanol was 1:1.5, P = 0.5-0.8 MPa, T = 323-333 K, The Pd and N,S-CQDs loadings of the catalyst prepared by the same method as Pd@N,S-CQDs-62.5 are both 1 wt %. The hydrogenation reaction was carried out in 8000L tank reactor. The catalyst cycle in reaction system was carried out by closed and highly efficient filters.

<sup>a</sup>: 0.5 and 0.3 Kg of fresh catalyst were added on 11<sup>th</sup> and 18<sup>th</sup> cycle because of mass loss during the catalyst filtration.
